# Supplementary material for: Microbial Transformation of Hesperidin and Biological Evaluation
Source: PubMed Central journal article supplement (PMC10652256; doi:10.1021/acsomega.3c05334), 2023-11-01
Supplement: ao3c05334_si_001.pdf [file ao3c05334_si_001.pdf]

## **-SUPPORTING INFORMATION-**

# **Microbial Transformation of Hesperidin and Biological Evaluation**

Damla Kirci<sup>1\*</sup>, Fatih Demirci<sup>2,3</sup>, Betül Demirci<sup>2\*</sup>

<sup>1</sup> Department of Pharmacognosy, Faculty of Pharmacy, Selçuk University, Konya, Türkiye

<sup>2</sup> Department of Pharmacognosy, Faculty of Pharmacy, Anadolu University, Eskişehir, Türkiye

<sup>3</sup> Faculty of Pharmacy, Eastern Mediterranean University, Famagusta, N. Cyprus, via Mersin Türkiye

\*To whom correspondence should be addressed:

Dr. DAMLA KIRCI

Tel.: +90 539-799-6898

E-mail: [damla.kirci@selcuk.edu.tr](mailto:damla.kirci@selcuk.edu.tr)

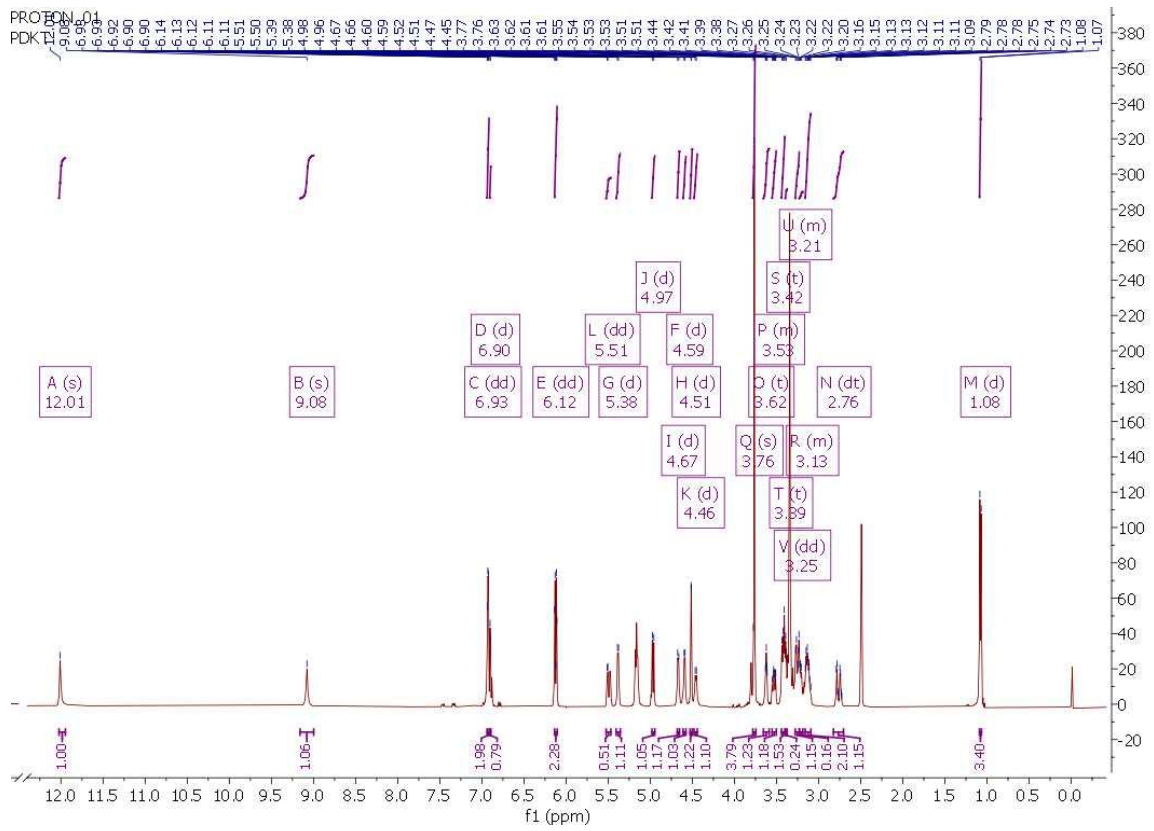

Figure S1. <sup>1</sup>H-NMR spectrum of hesperidin

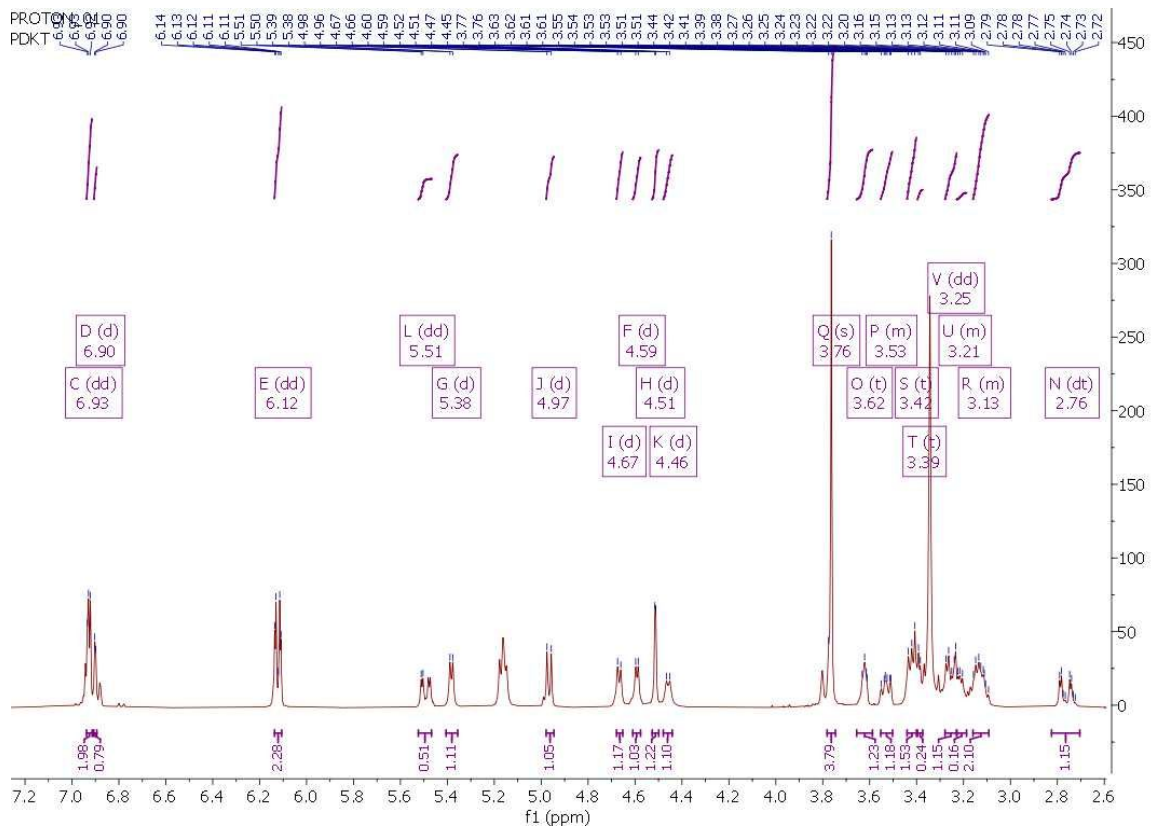

Figure S2. <sup>1</sup>H-NMR spectrum of Hesperidin (2.6-7.2 ppm)

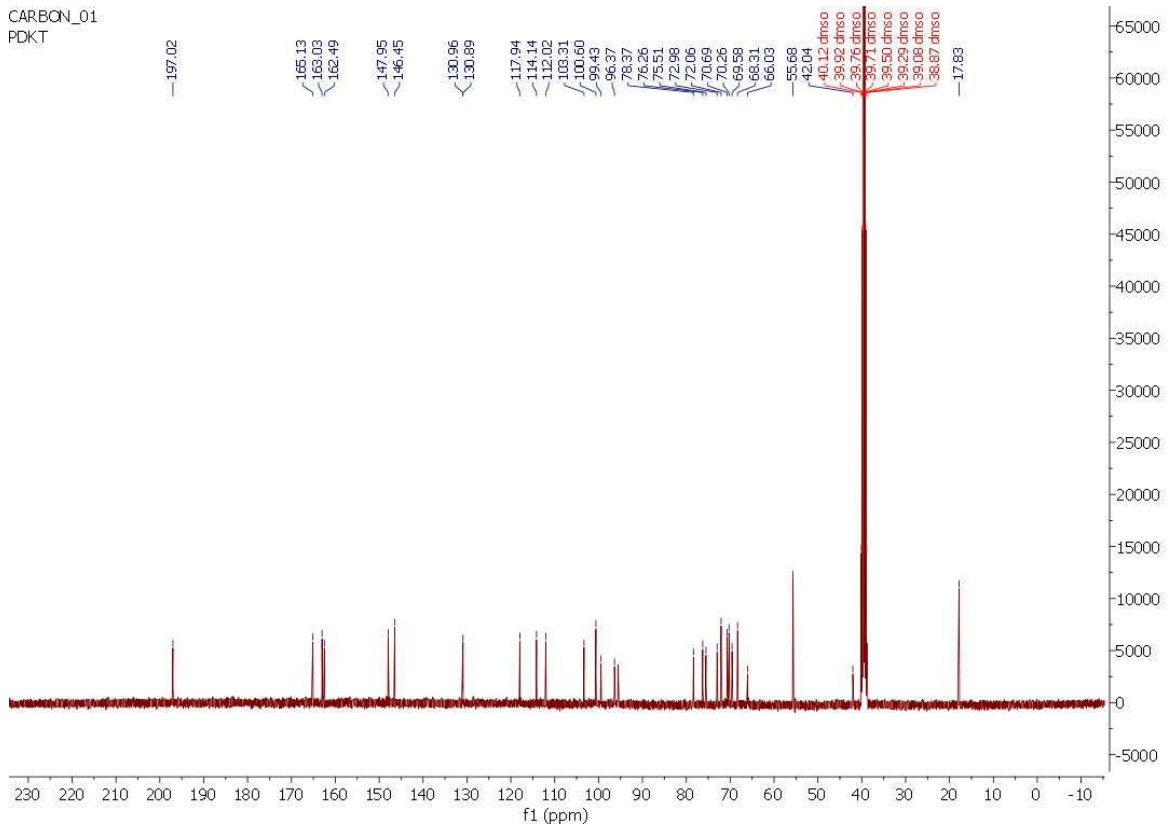

Figure S3.  $^{13}\text{C}$ -NMR spectrum of hesperidin

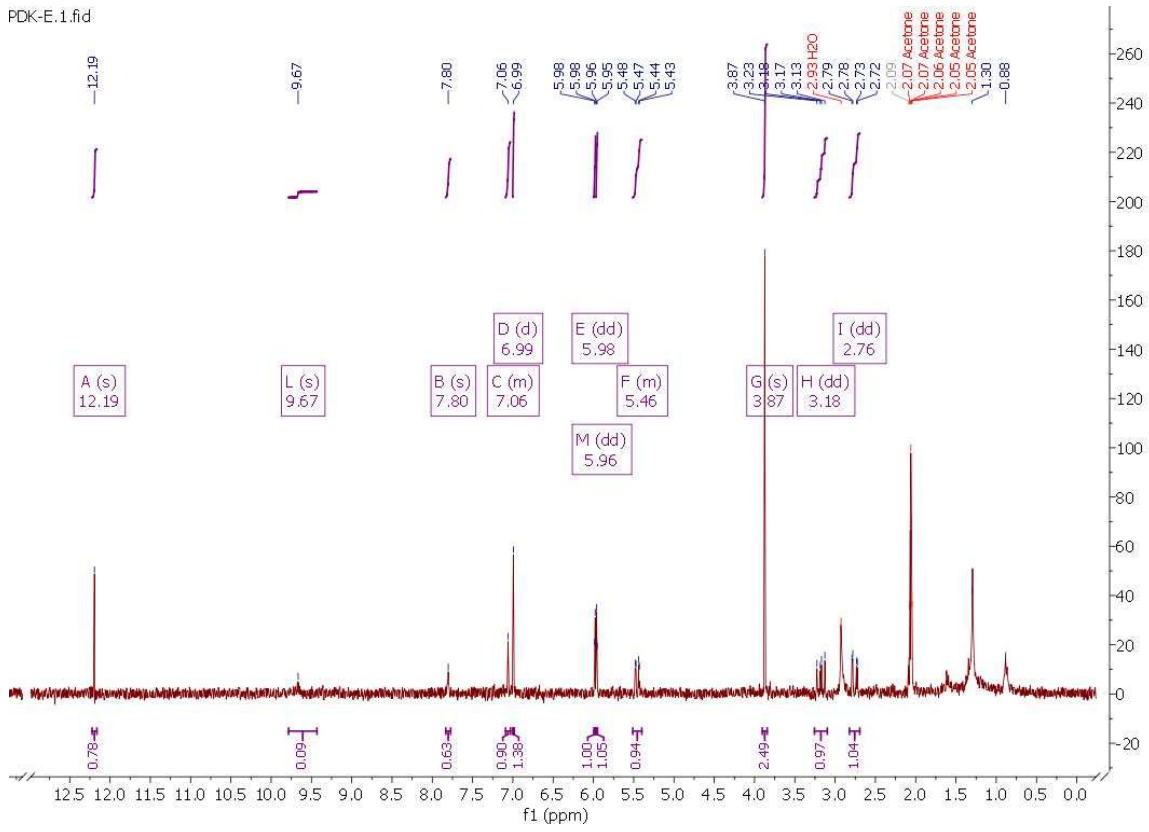

Figure S4. <sup>1</sup>H-NMR spectrum of hesperitin

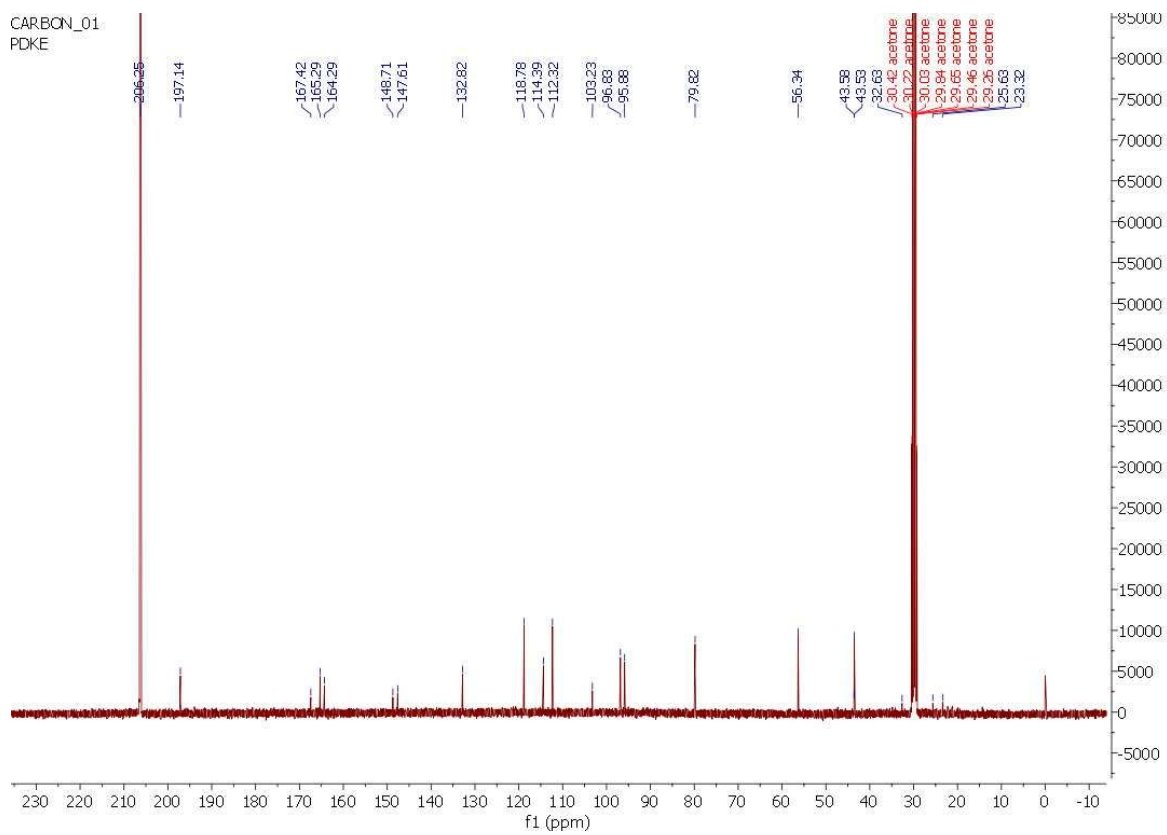

**Figure S5.**  $^{13}\text{C}$ -NMR spectrum of hesperetin

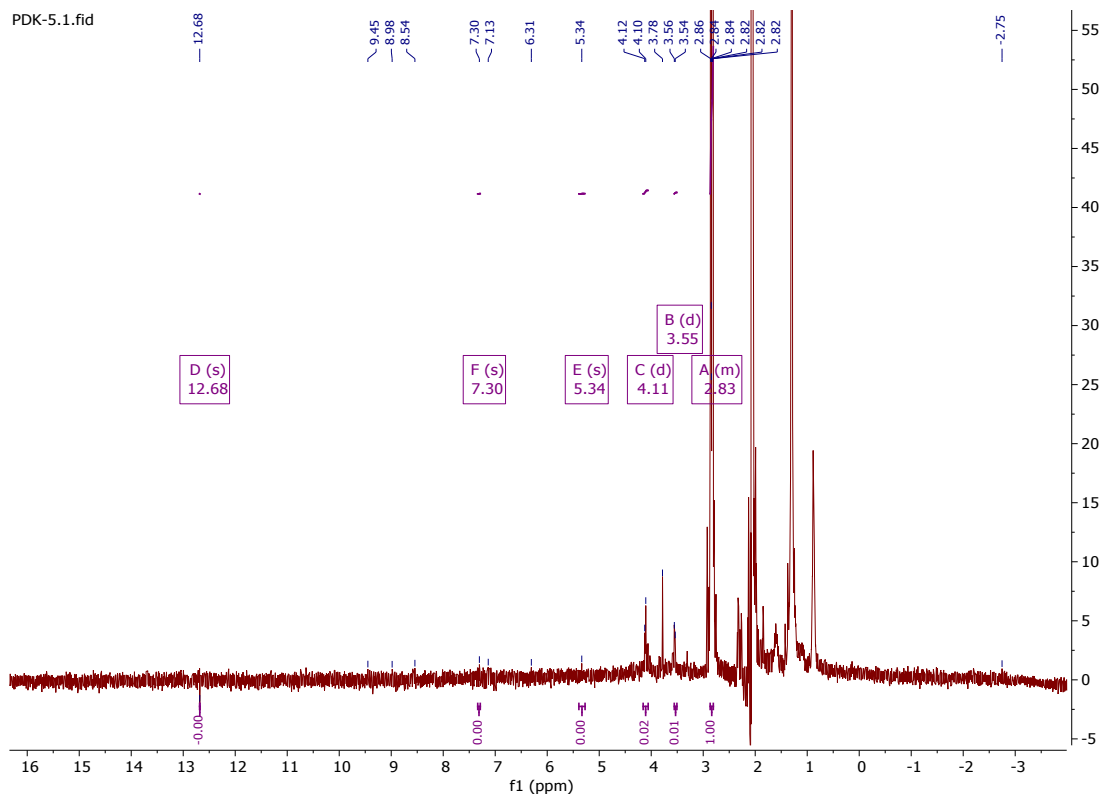

**Figure 6.**  $^1\text{H}$ -NMR spectrum of eriodictyol

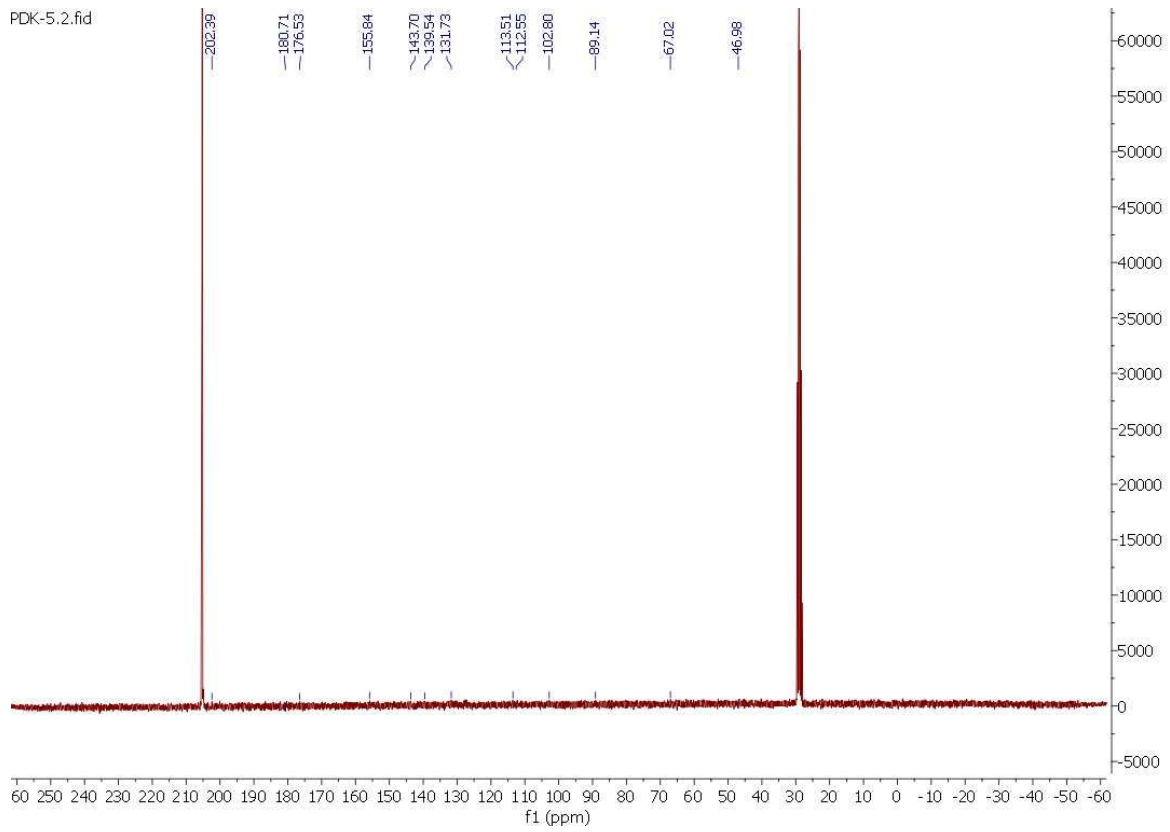

**Figure 7.** <sup>13</sup>C-NMR spectrum of eriodictyol
